# Supplementary material for: The Insights into Mitochondrial Genomes of Sunflowers
Source: MDPI journal article supplement (doi:10.3390/plants10091774), 2021-08-26
Supplement: s1 [file s1]

**Table S1.** Species specific SNP identified in *H. occidentalis* and *H. tuberosus* mitogenomes

| Position in <i>H. occidentalis</i><br>mitogenome | <i>H. occidentalis</i> | <i>H. tuberosus</i>    | <i>H.</i><br><i>grosseserratus</i> | <i>H. strumosus</i> |
|--------------------------------------------------|------------------------|------------------------|------------------------------------|---------------------|
| 48227                                            | T                      | G                      | G                                  | G                   |
| 110132                                           | T                      | G                      | G                                  | G                   |
| 145262                                           | C                      | A                      | A                                  | A                   |
| 150145                                           | C                      | G                      | G                                  | G                   |
| 150364                                           | C                      | G                      | G                                  | G                   |
| 150571                                           | T                      | G                      | G                                  | G                   |
| 173171                                           | C                      | A                      | A                                  | A                   |
| 181893                                           | T                      | G                      | G                                  | G                   |
| 199009                                           | C                      | A                      | A                                  | A                   |
| 231470                                           | T                      | G                      | G                                  | G                   |
| 240885                                           | C                      | A                      | A                                  | A                   |
| 266122                                           | C                      | A                      | A                                  | A                   |
| Position in <i>H. tuberosus</i><br>mitogenome    | <i>H. tuberosus</i>    | <i>H. occidentalis</i> | <i>H.</i><br><i>grosseserratus</i> | <i>H. strumosus</i> |
| 73577                                            | T                      | G                      | G                                  | G                   |
| 92760                                            | G                      | T                      | T                                  | T                   |
| 147829                                           | G                      | T                      | T                                  | T                   |
| 153674                                           | C                      | A                      | A                                  | A                   |
| 231384                                           | T                      | G                      | G                                  | G                   |
| 257468                                           | T                      | G                      | G                                  | G                   |

**Table S2.** SSR motif length distribution table. “x” – lower than threshold, “-” – not found.

| H. occidentalis /<br>H. tuberosus /<br>H. strumosus /<br>H. grosseserratus |         | Length of SSR |         |         |       |         |         |         | Total |
|----------------------------------------------------------------------------|---------|---------------|---------|---------|-------|---------|---------|---------|-------|
|                                                                            |         |               |         |         |       |         |         |         |       |
|                                                                            |         |               |         |         |       |         |         |         |       |
|                                                                            |         |               |         |         |       |         |         |         |       |
| Motifs                                                                     | <5      | 5-7           | 8-10    | 11-15   | 16-30 | 31-40   | >40     |         |       |
| T                                                                          | x       | x             | 1/1/1/0 | 1/1/2/1 | -     | 1/0/0/1 | 0/1/0/1 | 3/3/3/3 |       |
| A                                                                          | x       | x             | 1/1/2/1 | 0/2/1/1 | -     | -       | 0/0/0/1 | 1/3/3/3 |       |
| G                                                                          | x       | x             | 2/1/1/2 | 0/0/1/0 | -     | -       | -       | 2/1/2/2 |       |
| C                                                                          | x       | x             | 0/0/0/1 | -       | -     | -       | -       | 0/0/0/1 |       |
| TC                                                                         | x       | 1/1/0/0       | 1/0/0/0 | -       | -     | -       | -       | 2/1/0/0 |       |
| TA                                                                         | x       | 2/2/2/3       | -       | -       | -     | -       | -       | 2/2/2/3 |       |
| AG                                                                         | x       | 1/2/0/0       | 0/1/1/0 | -       | -     | -       | -       | 1/3/1/0 |       |
| AT                                                                         | x       | 1/1/1/1       | -       | -       | -     | -       | -       | 1/1/1/1 |       |
| CT                                                                         | x       | 1/0/2/2       | -       | -       | -     | -       | -       | 1/0/2/2 |       |
| GA                                                                         | x       | 0/0/1/1       | -       | -       | -     | -       | -       | 0/0/1/1 |       |
| ATT                                                                        | x       | 1/1/0/0       | -       | -       | -     | -       | -       | 1/1/0/0 |       |
| GGTT                                                                       | 1/1/1/0 | -             | -       | -       | -     | -       | -       | 1/1/1/0 |       |
| GAAA                                                                       | 1/1/0/1 | -             | -       | -       | -     | -       | -       | 1/1/0/1 |       |
| TTAC                                                                       | 1/0/0/0 | -             | -       | -       | -     | -       | -       | 1/0/0/0 |       |
| CTTA                                                                       | 0/1/0/0 | -             | -       | -       | -     | -       | -       | 0/1/0/0 |       |
| GTAA                                                                       | 0/0/2/0 | -             | -       | -       | -     | -       | -       | 0/0/2/0 |       |
| TTTC                                                                       | 0/0/1/0 | -             | -       | -       | -     | -       | -       | 0/0/1/0 |       |
| AAAT                                                                       | 0/0/0/1 | -             | -       | -       | -     | -       | -       | 0/0/0/1 |       |
| AACC                                                                       | 0/0/0/1 | -             | -       | -       | -     | -       | -       | 0/0/0/1 |       |
| AAAGA                                                                      | 1/1/1/0 | -             | -       | -       | -     | -       | -       | 1/1/1/0 |       |

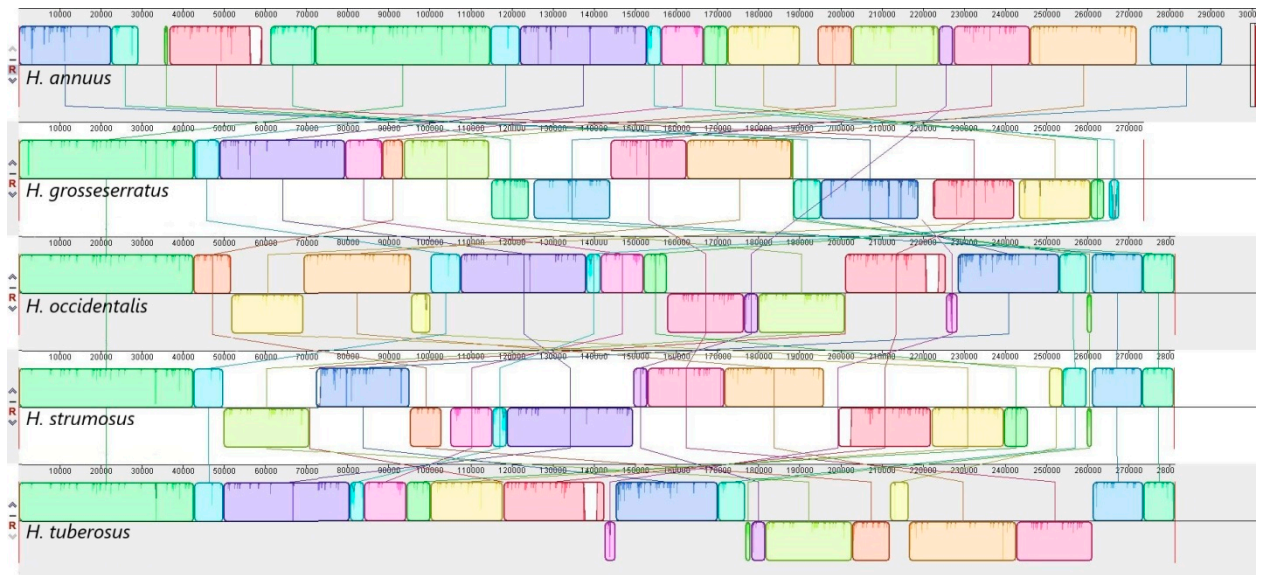

**Figure S1.** The progressive MAUVE alignment of complete mitogenomes between annual (*H. annuus*) and perennial (*H. grosseserratus*, *H. occidentalis*, *H. strumosus*, *H. tuberosus*) sunflower species

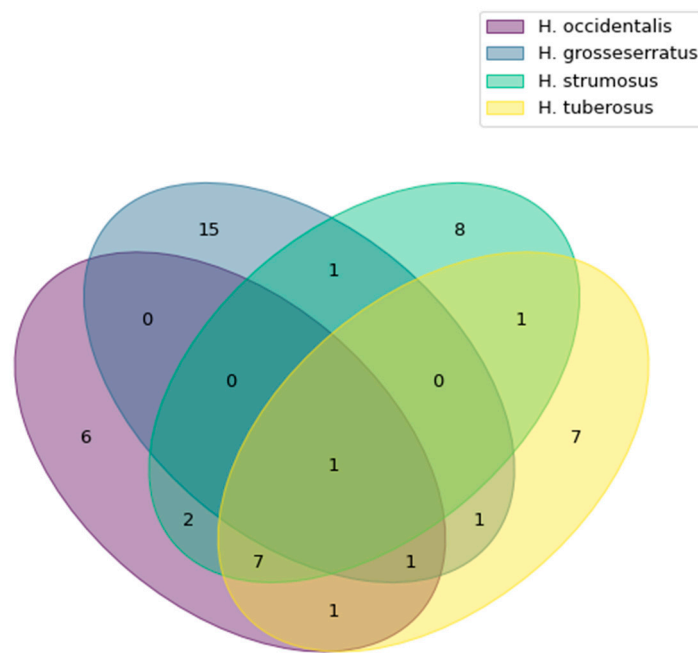

**Figure S2.** Venn diagram of SSRs comparison between species.
